# Supplementary material
Source: Research Square preprint supplement (doi:10.21203/rs.3.rs-9146107/v1)
Supplement: Supplementary file 1 [file 9bf20250a206831df0c3282e.docx]

**Supplementary materials**

Clustered direct sexual risk behaviors and adverse sex-related outcomes among sexually experienced college students in Eastern China: a multicenter cross-sectional study of eHealth literacy, HIV/STI knowledge, and childhood/adolescent sexual victimization

This supplement accompanies the main manuscript and provides variable coding, item-level knowledge performance, secondary outcome models, and sensitivity analyses.

# Supplementary Table S1. Variable definitions and coding

| **Role** | **Variable** | **Definition** | **Coding** |
| --- | --- | --- | --- |
| Primary outcome | Clustered direct sexual risk behaviors | Reporting >=2 of 4 direct behaviors: no contraception at first sex, casual sex, multiple concurrent partners, drug-facilitated sex | Binary |
| Secondary outcome | Any adverse sex-related outcome | Reporting >=1 of 3 outcomes: unintended pregnancy/impregnation, abortion, self-reported STI diagnosis | Binary |
| Exposure | eHEALS total score | Sum of 8 items scored 1-5; higher indicates higher self-perceived eHealth literacy | Continuous, range 8-40 |
| Exposure | 29-item HIV/STI knowledge index | Number of correct responses using the prespecified ARC/RUSSL-derived answer key | Continuous, range 0-29 |
| Exposure | Childhood/adolescent sexual victimization | None; harassment only; contact/coercive victimization | Categorical, 3 levels |
| Covariate | Sex education exposure | Ever vs never received sex education | Binary |
| Covariate | Sex | Male vs female | Binary |
| Covariate | Current age | Derived from date of birth using 15 Oct 2025 as reference | Continuous, years |
| Covariate | Institution type | Regular university, 985 university, 211 university, vocational college | Categorical |
| Covariate | Relationship status | Never dated, currently in relationship, previously dated and now separated | Categorical |
| Covariate | Parental education | Highest parental education in five ordered categories | Categorical |
| Covariate | Monthly expenditure | Five categories during college | Categorical |
| Covariate | Family structure | Intact family vs other family structure | Binary |
| Covariate | Smoking | Current smoking vs never smoking | Binary |
| Covariate | Alcohol use | Frequent use (>=weekly) vs rare/none | Binary |
| Covariate | Physical activity | <1 h/day, 1-3 h/day, >3 h/day | Categorical |
| Covariate | Age at sexual debut | Numeric age at first sexual intercourse | Continuous, years |

# Supplementary Table S2. Item-level knowledge performance

| **item_no** | **item_text** | **correct_answer** | **n_correct** | **pct_correct** | **corrected_item_total_r** | **kr20_if_deleted** |
| --- | --- | --- | --- | --- | --- | --- |
| 132 | 132. 发生性行为时，HIV 会在人与人之间传播吗? | 是 | 1322 | 78.6 | 0.128 | 0.503 |
| 133 | 133. 性交时使用安全套，能帮助预防感染 HIV 吗? | 是 | 1007 | 59.9 | 0.02 | 0.518 |
| 134 | 134. 看起来很健康的 HIV 感染者也可能把病毒传给他人吗? | 是 | 996 | 59.3 | 0.078 | 0.51 |
| 135 | 135. 拥抱一位感染 HIV 的人会感染 HIV 吗? | 否 | 1120 | 66.6 | 0.323 | 0.475 |
| 136 | 136. 口服避孕药能保护人不感染 HIV 吗? | 否 | 1019 | 60.6 | 0.322 | 0.474 |
| 137 | 137. 注射毒品时与他人共用针头或注射器，会把 HIV 传染给他人吗? | 是 | 1256 | 74.7 | 0.175 | 0.497 |
| 138 | 138. 所有性传播感染（STIs）都是由同一种病毒引起的。 | 否 | 848 | 50.4 | 0.12 | 0.504 |
| 139 | 139. 衣原体感染只会影响有子宫的人。 | 否 | 1013 | 60.3 | 0.226 | 0.488 |
| 140 | 140. 必须发生插入性性行为才会感染生殖器疣。 | 否 | 787 | 46.8 | 0.111 | 0.505 |
| 141 | 141. 如生殖器出现带有强烈气味的黄色分泌物，可能患有衣原体感染。 | 是 | 1071 | 63.7 | 0.067 | 0.511 |
| 142 | 142. 注射毒品时共用注射器和针头的人，并不会增加感染丙型肝炎的风险。 | 否 | 933 | 55.5 | 0.173 | 0.496 |
| 143 | 143. 患有生殖器疱疹的人必须有开放性溃疡才会把感染传给性伴侣。 | 否 | 741 | 44.1 | 0.18 | 0.495 |
| 144 | 144. 过去得过淋病的人会对淋病产生免疫（受到保护），不会再次感染。 | 否 | 907 | 54.0 | 0.237 | 0.486 |
| 145 | 145. 有疫苗可以预防乙型肝炎。 | 是 | 934 | 55.6 | -0.028 | 0.525 |
| 146 | 146. 如果一个人的 HIV 检测呈阳性，该检测能判断此人将来病情会多严重。 | 否 | 823 | 49.0 | 0.17 | 0.496 |
| 147 | 147. 通过在他人附近咳嗽或打喷嚏，HIV 会传播吗? | 否 | 989 | 58.8 | 0.357 | 0.469 |
| 148 | 148. 衣原体感染可能导致不孕。 | 是 | 920 | 54.7 | 0.012 | 0.519 |
| 149 | 149. 仅凭外观就能判断自己是否患有淋病。 | 否 | 1002 | 59.6 | 0.204 | 0.491 |
| 150 | 150. 一旦感染了生殖器疱疹，体内将一直存在这种病毒。 | 是 | 976 | 58.1 | -0.027 | 0.524 |
| 151 | 151. 目前有疫苗可以预防衣原体感染。 | 否 | 823 | 49.0 | 0.142 | 0.501 |
| 152 | 152. 使用无菌或清洁器具进行文身和穿孔也会传播丙型肝炎。 | 否 | 776 | 46.2 | 0.095 | 0.507 |
| 153 | 153. 人可以凭身体感觉来判断自己是否患有乙型肝炎。 | 否 | 962 | 57.2 | 0.174 | 0.496 |
| 154 | 154. 生殖器疱疹是由与 HIV 相同的病毒引起的。 | 否 | 783 | 46.6 | 0.128 | 0.503 |
| 155 | 155. 目前有可用疫苗可以预防淋病。 | 否 | 904 | 53.8 | 0.113 | 0.505 |
| 156 | 156. 频繁发生尿路感染会导致衣原体感染。 | 否 | 777 | 46.2 | -0.028 | 0.525 |
| 157 | 157. HIV 会通过蚊虫叮咬传播吗? | 否 | 902 | 53.7 | 0.125 | 0.503 |
| 158 | 158. 人乳头瘤病毒（HPV）会导致 HIV。 | 否 | 873 | 51.9 | 0.155 | 0.499 |
| 159 | 159. HPV 是由与 HIV 相同的病毒引起的。 | 否 | 870 | 51.8 | 0.225 | 0.488 |
| 160 | 160. 服用药片（暴露前预防 PrEP 或暴露后预防 PEP）可以阻止感染 HIV 吗? | 是 | 1044 | 62.1 | -0.093 | 0.533 |

KR-20 for the full 29-item index was 0.51. Even after applying the prespecified answer key, several items showed weak or negative corrected item-total correlations, supporting the interpretation of this measure as a heterogeneous knowledge index rather than a unidimensional scale.

# Supplementary Table S3. Selected secondary outcome models

| **Predictor** | **No contraception at first sex** | **Casual sex** | **Multiple partners** | **Drug-facilitated sex** | **Any adverse outcome** |
| --- | --- | --- | --- | --- | --- |
| Contact/coercive victimization | 1.02 (0.90-1.15) | 1.13 (0.96-1.33) | 2.51 (1.88-3.36) | 1.14 (0.82-1.59) | 1.69 (1.31-2.17) |
| eHEALS (per 5 points) | 0.97 (0.95-1.00) | 0.97 (0.94-1.01) | 0.97 (0.90-1.06) | 1.12 (1.03-1.22) | 0.90 (0.84-0.97) |
| Knowledge index (per 5 points) | 1.02 (0.97-1.08) | 1.02 (0.95-1.10) | 0.91 (0.78-1.07) | 1.30 (1.13-1.49) | 0.91 (0.79-1.06) |
| Received sex education | 0.89 (0.83-0.96) | 1.29 (1.15-1.44) | 1.20 (0.95-1.51) | 1.03 (0.83-1.28) | 1.09 (0.88-1.35) |
| Male sex | 1.02 (0.94-1.10) | 1.26 (1.11-1.43) | 1.15 (0.88-1.50) | 0.90 (0.70-1.14) | 0.75 (0.59-0.94) |
| Current smoking | 0.89 (0.82-0.97) | 1.19 (1.06-1.34) | 1.58 (1.21-2.07) | 0.99 (0.78-1.25) | 1.68 (1.31-2.16) |
| Frequent alcohol use | 0.97 (0.88-1.07) | 1.00 (0.88-1.13) | 1.38 (1.08-1.75) | 1.27 (0.99-1.62) | 1.35 (1.07-1.70) |
| Age at sexual debut (per year) | 1.03 (1.01-1.06) | 0.91 (0.87-0.94) | 0.79 (0.73-0.85) | 1.02 (0.94-1.10) | 0.84 (0.79-0.89) |

Each cell reports the adjusted prevalence ratio (95% CI) from a modified Poisson model adjusted for the same covariate set used in the primary model.

# Supplementary Table S4. Stricter primary outcome (>=3 of 4 direct behaviors)

| **Predictor** | **aPR (95% CI)** | **P value** |
| --- | --- | --- |
| Harassment only (vs none) | 0.89 (0.56-1.41) | 0.622 |
| Contact/coercive victimization (vs none) | 2.36 (1.61-3.47) | <0.001 |
| eHEALS (per 5-point increase) | 0.93 (0.84-1.03) | 0.156 |
| Knowledge index (per 5-point increase) | 1.10 (0.89-1.36) | 0.369 |
| Received sex education | 1.71 (1.24-2.35) | <0.001 |
| Male sex | 1.45 (1.01-2.08) | 0.043 |
| Current age (per year) | 1.03 (0.96-1.12) | 0.392 |
| Intact family structure | 0.67 (0.46-0.97) | 0.036 |
| Current smoking | 1.24 (0.87-1.76) | 0.242 |
| Frequent alcohol use | 1.54 (1.11-2.13) | 0.009 |
| Age at sexual debut (per year) | 0.77 (0.69-0.85) | <0.001 |

# Supplementary Table S5. Sensitivity model excluding eHEALS

| **Predictor** | **aPR (95% CI)** | **P value** |
| --- | --- | --- |
| Harassment only | 1.18 (1.01-1.39) | 0.041 |
| Contact/coercive victimization | 1.57 (1.32-1.86) | <0.001 |
| Knowledge index (per 5 points) | 1.14 (1.05-1.24) | 0.003 |
| Received sex education | 0.98 (0.86-1.12) | 0.793 |
| Male sex | 1.25 (1.08-1.46) | 0.004 |
| Current age (per year) | 1.04 (1.00-1.07) | 0.038 |
| Intact family structure | 0.78 (0.67-0.90) | <0.001 |
| Current smoking | 1.22 (1.05-1.41) | 0.008 |
| Frequent alcohol use | 1.15 (1.00-1.32) | 0.048 |
| Age at sexual debut (per year) | 0.93 (0.89-0.98) | 0.003 |

# Supplementary Table S6. Exploratory eHEALS quartile model

| **Comparison** | **aPR (95% CI)** | **P value** |
| --- | --- | --- |
| Q2 vs Q1 | 0.76 (0.64-0.91) | 0.002 |
| Q3 vs Q1 | 0.79 (0.66-0.93) | 0.006 |
| Q4 vs Q1 | 0.98 (0.82-1.17) | 0.784 |

The quartile model suggested a non-monotonic association, with lower adjusted prevalence in the second and third quartiles relative to the lowest quartile, but no clear gradient in the highest quartile.

# Supplementary Table S7. Exploratory domain-specific knowledge model

| **Predictor** | **aPR (95% CI)** | **P value** |
| --- | --- | --- |
| eHEALS (per 5 points) | 0.96 (0.92-1.01) | 0.082 |
| HIV knowledge z-score | 1.14 (1.06-1.22) | <0.001 |
| STI/HPV knowledge z-score | 1.00 (0.94-1.07) | 0.943 |
| Hepatitis knowledge z-score | 1.02 (0.95-1.09) | 0.598 |
| Harassment only | 1.16 (0.99-1.36) | 0.071 |
| Contact/coercive victimization | 1.56 (1.32-1.85) | <0.001 |

# Supplementary Table S8. Sex-stratified and interaction analyses

| **Stratum** | **Predictor** | **aPR (95% CI)** | **P value** |
| --- | --- | --- | --- |
| Women | Harassment only | 1.28 (0.96-1.70) | 0.095 |
| Women | Contact/coercive victimization | 1.89 (1.42-2.52) | <0.001 |
| Women | eHEALS (per 5 points) | 1.01 (0.93-1.09) | 0.868 |
| Women | Knowledge index (per 5 points) | 1.17 (0.99-1.38) | 0.062 |
| Women | Received sex education | 1.15 (0.91-1.45) | 0.252 |
| Women | Current age (per year) | 1.04 (0.98-1.10) | 0.191 |
| Women | Intact family structure | 0.74 (0.57-0.98) | 0.035 |
| Women | Current smoking | 1.45 (1.13-1.85) | 0.003 |
| Women | Frequent alcohol use | 1.02 (0.77-1.34) | 0.912 |
| Women | Age at sexual debut (per year) | 0.89 (0.83-0.96) | 0.003 |
| Men | Harassment only | 1.21 (0.98-1.48) | 0.071 |
| Men | Contact/coercive victimization | 1.25 (0.99-1.58) | 0.062 |
| Men | eHEALS (per 5 points) | 0.96 (0.91-1.01) | 0.111 |
| Men | Knowledge index (per 5 points) | 1.10 (0.99-1.22) | 0.080 |
| Men | Received sex education | 0.95 (0.81-1.11) | 0.538 |
| Men | Current age (per year) | 1.04 (0.99-1.08) | 0.086 |
| Men | Intact family structure | 0.82 (0.68-0.98) | 0.032 |
| Men | Current smoking | 1.08 (0.91-1.29) | 0.370 |
| Men | Frequent alcohol use | 1.24 (1.05-1.46) | 0.011 |
| Men | Age at sexual debut (per year) | 0.96 (0.91-1.02) | 0.212 |

**Interaction model:**

| **Term** | **aPR (95% CI)** | **P value** |
| --- | --- | --- |
| Harassment only (vs none) | 1.24 (0.94-1.65) | 0.126 |
| Contact/coercive victimization (vs none) | 1.99 (1.53-2.59) | <0.001 |
| Male sex | 1.42 (1.13-1.77) | 0.002 |
| Harassment only × male interaction | 0.96 (0.68-1.35) | 0.807 |
| Contact/coercive × male interaction | 0.63 (0.45-0.88) | 0.008 |

In the interaction model, the contact/coercive-by-male interaction term was below 1.0, suggesting that the association between contact/coercive victimization and clustered direct sexual risk behaviors was stronger among women than among men in this sample.
